1 **Screening and identification of MicroRNAs expressed**  
2 **in perirenal adipose tissue during rabbit growth**

3 Guoze Wang<sup>\*,†</sup>, Guo Guo<sup>†</sup>, Xueting Tian<sup>‡</sup>, Shenqiang Hu<sup>\*</sup>, Kun Du<sup>\*</sup>,  
4 Jingxin Mao<sup>§</sup>, Xianbo Jia<sup>\*</sup>, Shiyi Chen<sup>\*</sup>, Jie Wang<sup>\*</sup> & Songjia Lai<sup>\*</sup>

5

6 <sup>\*</sup> Farm Animal Genetic Resources Exploration and Innovation Key  
7 Laboratory of Sichuan Province, Sichuan Agricultural University,  
8 Chengdu 611130, China

9 <sup>†</sup> Guizhou Medical University, Guiyang 550025, China

10 <sup>‡</sup> College of Pharmacy and Biological Engineering, Chengdu University,  
11 Chengdu 610106, China

12 <sup>§</sup> ChongQing University Of Science & Technology, Chongqing 401331,  
13 China

14

15

16

17

18

19

20

21

22

23 **Running title: Identification miRNAs in Rabbit adipose**

24 **Keywords:** Rabbit, MicroRNA, Adipose tissue, MiRNA-seq

25 **Corresponding author:** Songjia Lai

26 **Address:** Farm Animal Genetic Resources Exploration and Innovation

27 Key Laboratory of Sichuan Province, Sichuan Agricultural University,

28 Chengdu 611130, China

29 **E-mail:** [laisj5794@163.com](mailto:laisj5794@163.com)

30

31

32

33

34

35

36

37

38

39

40

41

42

43

44

45

## Abstract

46 MiRNAs regulate adipose tissue development, which are closely  
47 related to subcutaneous and intramuscular fat deposition and adipocyte  
48 differentiation. As an important economic and agricultural animal, rabbits  
49 have low adipose tissue deposition and are an ideal model to study  
50 adipose regulation. However, the miRNAs related to fat deposition during  
51 the growth and development of rabbits are poorly defined. In this study,  
52 miRNA-sequencing and bioinformatics analyses were used to profile the  
53 miRNAs in rabbit perirenal adipose tissue at 35, 85 and 120 days  
54 post-birth. Differentially expressed (DE) miRNAs between different  
55 stages were identified by DEseq in R. Target genes of DE miRNAs were  
56 predicted by TargetScan and miRanda. To explore the functions of  
57 identified miRNAs, Gene Ontology (GO) enrichment and Kyoto  
58 Encyclopedia of Genes and Genomes (KEGG) pathway analyses were  
59 performed. Approximately 1.6 GB of data was obtained by miRNA-seq.  
60 A total of 987 miRNAs (780 known and 207 newly predicted) and 174  
61 DE miRNAs were identified. The miRNAs ranged from 18nt to 26nt. GO  
62 enrichment and KEGG pathway analyses revealed that the target genes of  
63 the DE miRNAs were mainly involved in zinc ion binding, regulation of  
64 cell growth, MAPK signaling pathway, and other adipose  
65 hypertrophy-related pathways. Six DE miRNAs were randomly selected  
66 and their expression profiles were validated by q-PCR. In summary, we

67 provide the first report of the miRNA profiles of rabbit adipose tissue  
68 during different growth stages. Our data provide a theoretical reference  
69 for subsequent studies on rabbit genetics, breeding and the regulatory  
70 mechanisms of adipose development.

## 71 **Introduction**

72 MicroRNAs (miRNAs) are endogenous non-coding RNAs, typically  
73 18~26 nucleotides in length, that regulate gene expression in eukaryotic  
74 cells. Mature miRNAs are produced from long primary transcripts  
75 through a series of nucleases that are further assembled into  
76 RNA-induced silencing complexes. These complexes recognize target  
77 mRNAs by complementary base pairing, leading to mRNA degradation  
78 and the inhibition of translation(Fabian et al. 2010). MiRNAs regulate a  
79 wide range of physiological processes, including growth and  
80 development, virus defense, cell proliferation, apoptosis and fat  
81 metabolism. Meanwhile, it has been well documented that MiRNAs  
82 regulate adipose tissue development, which are closely related to  
83 subcutaneous and intramuscular fat deposition(Guoxi et al. 2011; Guo et  
84 al. 2012) and adipocyte differentiation(Son et al. 2014).MiRNAs,  
85 including miR-27b(Karbiener et al. 2009), miR-103(Meihang et al. 2015)  
86 and miR-148a(Shi et al. 2015) regulate adipogenic processes, promoting  
87 or inhibiting adipogenesis in animals. This implicates miRNAs can be a

88 new target for studying the molecular mechanisms governing fat  
89 development, growth and deposition in animals.

90 To-date, studies on the role of miRNAs during fat development have  
91 focused on humans, mice, livestock and poultry. Gu and colleagues (Gu  
92 and Eleswarapu 2007) screened miRNAs in bovine adipose tissue and  
93 breast tissue and identified 59 DE miRNAs, 5 of which differed from  
94 known mammalian miRNAs. Wang et al (Wang et al. 2018b) constructed  
95 an *in vitro* adipogenesis model of Crest-feather ducks and performed deep  
96 miRNA-sequencing, identifying 105 DE miRNAs, 12 of which were  
97 newly predicted and related to adipogenesis, including miR-223,  
98 miR-184-3p and miR-10b-5.

99 As an important economic and agricultural animal, rabbits are  
100 sources of meat and fur, and are widely used as experimental models in  
101 biomedical research. In addition, the adipose tissue of rabbits has low  
102 deposition rates during growth, making it an ideal model to study  
103 adipose regulation (Desando et al. 2013; Lunli et al. 2014; Wang et al.  
104 2015; Ye et al. 2014; Yu et al. 2015). However, studies on the miRNAs  
105 related to fat deposition during the growth and development of rabbits are  
106 limited. In this study, we performed miRNA-sequencing during three  
107 important stages of fat deposition (35, 85 and 120 days post-birth), to  
108 identify key miRNAs that regulate adipose growth. Our findings provide

109 a theoretical reference for subsequent studies on rabbit genetics and  
110 breeding and the regulatory mechanism of adipose development.

## 111 **Materials and methods**

### 112 **Animal and sample collection**

113 Tianfu Black rabbits (indigenous breed in Sichuan province of China)  
114 aged 35, 85 and 120 days were used in this study. Given the plasticity and  
115 maturation of rabbit adipose tissue, three biological replicates of perirenal  
116 adipose tissue were collected for 35 days (YR) and 120 days (TR), and  
117 two for 85 days (MR). The samples were snap frozen in liquid nitrogen,  
118 and stored at  $-80^{\circ}\text{C}$  until RNA extraction.

### 119 **Total RNA extraction**

120 Total RNA was isolated using Trizol Reagent (Life Technologies,  
121 Carlsbad, CA, USA). RNA purity and integrity were determined using a  
122 Nanodrop (Thermo Fisher Scientific, Waltham, MA, USA) and Agilent  
123 Bioanalyzer 2100 system (Agilent Technologies, CA, USA), respectively.  
124 Moreover, RNA concentrations were measured using a Qubit<sup>®</sup> RNA  
125 Assay Kit and Qubit<sup>®</sup> 2.0 Fluorometer (Life Technologies, Carlsbad, CA,  
126 USA). Only samples with RNA Integrity scores  $> 8$  were used for  
127 sequencing.

### 128 **MiRNA library construction and sequencing**

129 MiRNA libraries were constructed and sequenced by Mega  
130 Genomics Co.,Ltd., (Beijing, China). Sequencing libraries were prepared  
131 using TruSeq Small RNA Sample Prep Kits according to the  
132 manufacturers protocols (Illumina, San Diego, USA). Briefly, 3' and 5'  
133 linkers were used for cDNA synthesis, and PCR amplification. Target  
134 fragments were gel purified and the quality of the libraries were assessed  
135 using Bioanalyzer 2100 ( Agilent, CA, USA ). Libraries were sequenced  
136 on an Illumina Hiseq 2500 platform and 50-bp single-end reads were  
137 generated.

### 138 **MiRNA bioinformatics analysis**

139 MiRNAs were analyzed using ACGT101-miR (LC Sciences,  
140 Houston, Texas, USA). The analysis procedure was as follows: (1) 3'  
141 connector and non-specific sequences were removed to obtain clean data;  
142 (2) the length of the sequences were maintained at 18~26nt through  
143 length screening; (3) mRNAs, RFam and Repbase databases were used  
144 for comparative analysis and the filtration of remaining sequences; (4)  
145 filtering was used to obtain effective data and precursors were compared  
146 to rabbit reference genomes (GCF\_000003625.3\_OryCun2.0\_genomic.fa)  
147 for miRNA identification; (5) differentially expressed (DE) miRNAs  
148 were analyzed with  $p\text{-value(FDR)} \leq 0.05$  as the threshold; (6) target  
149 genes of DE miRNAs were predicted by TargetScan(Agarwal et al. 2015;  
150 Friedman et al. 2008; Nam et al. 2014) and miRanda(Betel et al. 2010;

151 Doron et al. 2008); (7) GO functional annotation and KEGG Pathway  
152 analysis were used to investigate the functional enrichment of the  
153 identified miRNA target genes.

#### 154 **Validation of DE miRNA by q-PCR**

155 Primers for the miRNAs and internal controls (**Table 1**) were designed  
156 using Primer-BLAST (<https://www.ncbi.nlm.nih.gov/tools/primer-blast/>).  
157 MiRNA-specific primers were synthesized by Sangon Biotech Co.  
158 (Shanghai). Six DE miRNAs were reverse transcribed into cDNA using  
159 Mir-X<sup>TM</sup> miRNA First-Strand Synthesis Kits (Takara, Dalian, China)  
160 according to the manufacturer's protocol. Q-PCR was performed using  
161 SYBR<sup>®</sup> Green II qRT-PCR kits (Takara, Dalian, China) according to the  
162 manufacturer's instructions. Reactions consisted of 4.5 µl SYBR<sup>®</sup> Green  
163 II, 1 µl cDNA, 0.5 µl of 10 µM forward and reverse primers, and 3.5 µl  
164 RNase free dH<sub>2</sub>O to a final volume of 10 µl. Reactions were performed  
165 on a Rotor gene 6000 PCR System (QIAGEN, Hiden, Germany) as  
166 follows: 95°C for 30 s, followed by 40 cycles of 95°C for 5 s, and 61°C  
167 for 20 s. The expression levels of the miRNAs were normalized to  
168 *GAPDH*. Relative gene expression was calculated using the  $2^{-\Delta\Delta Ct}$   
169 method(Livak and Schmittgen 2001). Data were expressed as the mean ±  
170 standard error of the mean (SEM).

#### 171 **Statistical analysis**



172 Statistical analysis was performed using SPSS Statistics 20.0 (SPSS  
173 Inc., Chicago, IL, USA).  $P < 0.05$  was considered statistically significant.

## 174 **Results**

### 175 **Overview of sequencing validation**

176 Eight miRNA libraries of YR-1, YR-2, YR-3, MR-1, MR-2, TR-1,  
177 TR-2, TR-3 were constructed and divided into YR, MR, TR groups. Up to  
178 1.6GB of data was obtained, and 8 libraries consisting of raw reads  
179 ranging from 10138426 to 15721988 were generated. FastQC (0.10.1)  
180 software was used to control data quality, through the removal of 3ADT  
181 & length filters (80% A or C / G or T; 3N; A alone; C without G; T alone;  
182 G alone; T without A; C alone; or continuous nucleotide dimers and  
183 trimers) and junk reads. After filtering and comparison to cellular  
184 mRNAs, RFam and Rепbase databases, 1416639 ~ 14139070 valid reads  
185 were obtained. The number of effective unique copies obtained from the  
186 libraries were 172905 ~ 381169, accounting for 29.91% ~ 47.15% of the  
187 total sample (**Table 2**).

### 188 **Length distribution of the candidate miRNAs**

189 Following counting and analysis of the original sequencing data, the  
190 length distribution of the miRNAs in the 8 libraries were similar, varying  
191 from 18 nt ~ 26 nt, with 22nt miRNAs most frequent (**Figure 1**). To  
192 further analyze the validity of the sequencing data, statistics on the length  
193 distribution of miRNAs (Unique) were performed on filtered datasets.

194 The results showed that number of the miRNAs in the 8 libraries were  
195 similar with > 60% of the reads 20~24 nt in size, consistent with the  
196 characteristics of Dicer enzyme cleavage. Some miRNAs were in 25nt  
197 and 26nt in length, accounting for < 6% of the total sequences(**Table 3**).

### 198 **Annotation and identification of miRNAs**

199 To obtain conserved miRNAs in rabbit adipose tissue, the  
200 ACGT101-miR (4.2) tool was used to compare the reference  
201 genome-matched reads with the known mature miRNAs in the miRase  
202 database. As a result, a total of 987 miRNAs were obtained during the  
203 three adipose growth stages, including 780 known miRNAs and 207  
204 newly predicted miRNAs. Meanwhile, 131 miRNAs were highly  
205 expressed, 652 were moderately expressed, and 204 were expressed to  
206 low-levels. In addition, miRNA expression varied during different  
207 adipose growth stages, with 620 miRNAs obtained by YR (35 days),  
208 865 obtained by MR (85 days), and 879 obtained by TR (120 days).  
209 These results showed that miRNA expression gradually increases during  
210 the adipose growth of rabbits.

211 As the sequence lengths of the miRNAs influence their regulation,  
212 the length distribution of the 987 miRNAs were assessed. The results  
213 showed that the lengths ranged from 18-26 nt, with 398 miRNAs 22 nt in  
214 length, accounting for the highest proportion (40.32%). while 26 nt  
215 miRNAs were least common (0.61%). The length distribution of the 780

216 known miRNAs was consistent with the total miRNAs, with the majority  
217 22 nt in length (43.08%). of the 207 newly predicted miRNAs, none were  
218 26nt, 2 were 25 nt, and 62 were 22 nt in length (**Table 4**).

219 The 987 miRNAs were next analyzed to assess their evolutionary  
220 conservation. The results showed that miRNAs originated from 103  
221 families, the numbers of which were differentially distributed. Members  
222 of the let-7 and miR-10 families were most frequent (11 miRNAs). Single  
223 miRNAs were identified for miR-196, miR-130 and miR-205 families.

#### 224 **Identification of differentially expressed miRNAs**

225 The DEGseq package in R was used to identify DE miRNAs and  
226 adjusted *P*-values ( $FDR \leq 0.05$ ) were taken as standards to screen DE  
227 miRNAs during the three stages of rabbit adipose growth. A total of 174  
228 DE miRNAs were obtained from 987 miRNAs in the three groups, of  
229 which 40.4% were up-regulated and 59.6% were down-regulated,  
230 indicating that the proportion of down-regulated miRNAs during rabbit  
231 adipose growth was significantly higher than the number of up-regulated  
232 miRNAs. Pairwise comparisons of the YR, MR and TR miRNA data  
233 showed 7, 164, 12 DE miRNAs between the respective growth stages,  
234 amongst which the number of DE miRNAs in the YR-vs-MR comparison  
235 group were the largest (**Figure 2**). Through in-depth analysis of the  
236 miRNA data obtained from inter-group comparisons, 12 DE miRNAs of  
237 YR-vs-TR showed moderate expression, 3 DE miRNAs of TR-vs-MR

238 showed moderate expression, and 49 DE miRNAs showed high  
239 expression in YR-vs-MR, indicating that miRNA expression was more  
240 active at 85 day of rabbit adipose growth.

241 To intuitively understand the expression of DE miRNAs in  
242 YR-vs-MR, hierarchical clustering was performed on the 164 screened  
243 miRNAs (**Figure 3**). As shown in Figure 3, 164 miRNAs showed  
244 differential expression patterns according to the different growth stages,  
245 and libraries of each group were comparable. The number of highly  
246 expressed DE miRNAs (red) in the MR group was significantly higher  
247 than the YR group.

#### 248 **Enrichment analysis of the target genes of DE miRNAs**

249 Target genes of the DE miRNAs were predicted using TargetScan  
250 and miRanda software, and their intersections were taken as final target  
251 genes. The number of targets of the 174 DE miRNAs were 13,204.  
252 According to the relationship between miRNAs and their target genes, the  
253 GO enrichment analysis showed that 13,347 GO terms were obtained,  
254 including 8807 terms of biological process (BP), 1279 terms of cell  
255 component (CC), and 3261 terms of molecular function (MF), amongst  
256 which 1048 terms were significantly enriched ( $P < 0.05$ ). Analysis of the  
257 1048 GO terms showed that the target genes of DE miRNAs were  
258 significantly enriched in protein binding, cytoplasm, zinc ion binding,  
259 regulation of cell growth, and ATP binding (**Figure 4**).

260 To more comprehensively describe the functions of the target genes  
261 during the different growth stages, enrichment analysis of the KEGG  
262 pathways was used to understand the biological functions of the genes.  
263 The results found that the target genes of DE miRNAs were enriched to  
264 315 KEGG pathways, 91 of which were significantly enriched ( $P < 0.05$ ),  
265 including the MAPK signaling pathway, Wnt signaling pathway, Renin  
266 secretion, FoxO signaling pathway, and Aldosterone synthesis and  
267 secretion (**Figure 5**).

#### 268 **Validation of DE miRNAs**

269 To validate the reliability of the miRNA-seq data, six miRNAs  
270 (ocu-miR-1296-5p, ocu-miR-193b-3p, mmu-miR-3968\_1ss14AT,  
271 mmu-miR-199a-3p\_R+1, ocu-let-7d-3p, ocu-miR-7a-5p) were randomly  
272 selected from 174 DE miRNAs to validate their expression profiles at  
273 these three growth stages by q-PCR. The results showed that all six  
274 miRNAs were differentially expressed during the different growth stages.  
275 In addition, the six miRNAs exhibited a similar trend between the results  
276 of miRNA-seq and q-PCR (**Figure 6**). Therefore, the FPKM obtained  
277 from the miRNA-seq datasets can be reliably used to determine miRNA  
278 expression, and confirmed the importance of DE miRNAs during the  
279 growth of rabbit adipose tissue.

#### 280 **Discussion**

281 In eukaryotes, miRNAs act as a broad class of widely occurring  
282 small-molecule ncRNAs that regulate gene expression through target  
283 ing mRNA transcription degradation and translation (Cesar et al. 20  
284 02; Xuemei 2004). MiRNAs play important roles in animal growth  
285 and development, host immune responses, adipose differentiation and  
286 lipid metabolism. Currently, approximately 2,000 miRNAs are recog  
287 nized in human and mouse genomes, the majority of which are ex  
288 pressed in a tissue-dependent manner (Ana and Sam 2014; Mariana  
289 et al. 2002). However, studies on the regulation of miRNAs during  
290 rabbit adipose growth and development are lacking. Here, we used  
291 MiRNA-sequencing to identify 987 miRNAs during three important  
292 stages of rabbit adipose growth, including 780 known miRNAs an  
293 d 207 newly predicted miRNAs. The miRNAs were derived from 1  
294 03 families with 643 seed region specificities, including miR-30 and  
295 miR-204. Studies have shown (Zaragosi 2011) that miR-30a and mi  
296 R-30d induce lipogenesis in obese patients through targeting *RUNX2*  
297 and miR-30c respectively, promoting the differentiation of human a  
298 dipocytes (Karbiener et al. 2011).

299 We compared the identified miRNAs to other species, which were  
300 distributed into 67 miRNAs that included *has*, *mmu*, and *bta*. In-depth  
301 analysis of the obtained miRNAs lengths revealed that both known  
302 miRNAs and newly predicted miRNAs were mainly 22 nt in length, and

303 increased in abundance during the three growth stages. Similarly, using  
304 HiSeq sequencing, Wang and colleagues(Wang et al. 2017) identified 329  
305 known miRNAs and 157 new miRNAs during the development of  
306 porcine adipose. Additionally, Wang and coworkers(Wang et al. 2018b)  
307 identified 105 DE miRNAs through the deep sequencing of duck adipose  
308 tissue and differentiated proadipocytes *in vitro*, demonstrating that  
309 miRNA expression varies among different species.

310 In the present study, the DEGseq R language package was used to  
311 identify DE miRNAs. We identified 174 DE miRNAs during the three  
312 growth stages of rabbits that were mostly down-regulated. Comparison of  
313 each of the stages showed that the number of DE miRNAs at 35 day  
314 and 85 day were highest. Adipose growth in the rabbits was significantly  
315 affected by age and miRNA expression was more prevalent during early  
316 growth stages. Amongst the 174 DE miRNAs, some were distributed in  
317 miR-133, miR-30 and let-7 families. Related studies showed that  
318 miR-133a is expressed in brown and white adipose tissue, directly  
319 targeting the 3'UTR region of *Prdm16*(Weiyi et al. 2013). miR-let-7b  
320 regulates the levels of human adipose tissue-derived mesenchymal stem  
321 cells (hAT-MSCs), and the transient inhibition of miR-let-7b enhances the  
322 differentiation of hAT-MSCs(Effat et al. 2015). These results suggest that  
323 the DE miRNAs identified in this study play regulatory roles during  
324 adipose growth in rabbit.

325 MiRNAs pair with the 3'UTRs of target genes to inhibit translation  
326 and silence gene expression at the post-transcriptional level.  
327 Bioinformatics estimates that 30-80% of the mammalian miRNAs target  
328 multiple cellular mRNAs(Friedman et al. 2008). In general, target genes  
329 regulated by the same miRNA originate from the same gene family(Yang  
330 et al. 2013). In this study, the 174 DE miRNAs were predicted to target  
331 13,204 genes, with an average of 76 genes targets for each predicted  
332 miRNA. Moreover, the target genes regulated by single miRNAs  
333 originated from the same family, and the DE miRNAs showed obvious  
334 temporal characteristics.

335 Compared to lncRNAs(Wang et al. 2018a), miRNAs and the target  
336 genes of DE miRNAs were mainly involved in GO functional terms  
337 including metabolic process, cell process and single organism process in  
338 the classification of biological processes, partial cells and organisms in  
339 the classification of cell components, and binding and catalytic activity in  
340 the classification of molecular functions. Based on our in-depth analysis  
341 of the 1048 significantly enriched GO terms, it was found that amongst  
342 the top 10 GO terms of biological process, cell composition and  
343 molecular function, some terms that strongly promote growth and volume  
344 increases in adipocytes, including protein localization to the plasma  
345 membrane, protein ubiquitination involved in ubiquitin-dependent protein  
346 catabolic process, regulation of cell growth, cytoplasm, Golgi apparatus,



347 membrane, protein binding, protein tyrosine phosphatase, zinc ion  
348 binding, ATP binding, and cadherin binding were identified. However,  
349 there were few related terms regarding glyceric acid absorption and lipid  
350 droplet formation during adipose hypertrophy. Recent studies on miRNA  
351 expression in human adipose tissue found that the expression of miRNAs  
352 were specific to the site of adipose tissue(Nora et al. 2009; Ortega et al.  
353 2010). Some miRNAs were associated with adipose tissue morphology,  
354 adipocyte size, and metabolic functions (fasting glucose, triglyceride).  
355 Combined with our data, the target genes of DE miRNAs more highly  
356 influenced cell membrane growth, protein synthesis and utilization,  
357 energy utilization and transformation, but their role in lipid droplet  
358 accumulation in adipocytes was not obvious.

359       Amongst the 91 pathways significantly enriched by KEGG, MAPK  
360 signaling pathway, Wnt signaling pathway and aldosterone synthesis and  
361 secretion pathways have been shown to regulate the growth and  
362 development of adipocytes. Related studies have shown that some  
363 miRNAs participate in the regulation of adipose deposition, for example,  
364 miR-148a promotes adipose synthesis by inhibiting the expression of  
365 *Wnt1*(Shi et al. 2015), whilst the over-expression of miR-10b L20  
366 significantly increases the levels of adipose and triglyceride(Lin et al.  
367 2010). In addition, miRNA families such as let-7, miR-30, miR-17,  
368 miR-148(Jing et al. 2012) and miR-24(Qiang et al. 2008; Kang et al.

369 2013) are involved in animal adipose deposition. miR-20a regulates  
370 adipocyte differentiation by targeting lysine-specific demethylase 6 b and  
371 transforming growth cytokine  $\beta$  signal(Zhou et al.). Previous  
372 studies(Michael et al. 2009) assessed the anti-adipogenesis characteristics  
373 of miR-27b, which was down-regulated during adipocyte differentiation  
374 and weakened the induction of *PPARc*. The expression of miR-95  
375 significantly correlated with adipocyte size, and its expression  
376 significantly increased during adipocyte differentiation(Nora et al. 2009).  
377 Therefore, the results of this study suggest that miRNAs with tissue and  
378 developmental stage specificity play key roles in the growth and  
379 maturation of rabbit adipose tissue.

## 380 **Conclusions**

381 In conclusion, to the best of our knowledge, this is the first report to  
382 perform miRNA profiling of rabbit perirenal adipose tissue during  
383 different growth stages, which identified 987 miRNAs and 174 DE  
384 miRNAs associated with adipogenetic pathways. These included the  
385 regulation of cell growth, zinc ion binding, MAPK signaling pathway,  
386 and Wnt signaling pathway. These DE miRNAs therefore regulate the  
387 growth and hypertrophy of adipose tissue in rabbits.

388

## 389 **Acknowledgments**

390 We thank the staff at our laboratory for their ongoing assistance. We  
391 also thank Xing-zhou Tian for insightful feedback on the study.

392

### 393 **Authors' contributions**

394 GZW, XBJ, SJL designed and directed the study. GZW, GG, KD  
395 performed the experiments, data analysis and drafted the manuscript.  
396 XTT, JXM, SYC contributed to the analysis and writing of the  
397 manuscript. SQH, JW, SJL critically reviewed drafts of the manuscript  
398 and made comments to improve clarity. All authors approved the final  
399 version of this article.

400

### 401 **Animal ethical approval**

402 All surgical procedures involving rabbits were performed according  
403 to the approved protocols of the Biological Studies Animal Care and Use  
404 Committee, Sichuan Province, China. Rabbits had free access to food and  
405 water under normal conditions and were humanely sacrificed as  
406 necessary to ameliorate suffering.

407

### 408 **Funding**

409 This work was supported by Breeding and Breeding material  
410 innovation of high quality characteristic rabbit mating  
411 line(2016NYZ0046).

## 412 **References**

- 413 Agarwal, V., G.W. Bell, J.W. Nam, and D.P. Bartel, 2015 Predicting effective  
414 microRNA target sites in mammalian mRNAs. *eLife*,4,(2015-07-12) 4  
415 (e05005).
- 416 Ana, K., and G.J. Sam, 2014 miRBase: annotating high confidence microRNAs using  
417 deep sequencing data. *Nucleic Acids Res* 42 (Database issue):D68.
- 418 Betel, D., A. Koppal, P. Agius, C. Sander, and C. Leslie, 2010 Comprehensive  
419 modeling of microRNA targets predicts functional non-conserved and  
420 non-canonical sites. *Genome Biology* 11 (8):R90-R90.
- 421 Cesar, L., X. Zhixin, K.D. Kasschau, and J.C. Carrington, 2002 Cleavage of  
422 Scarecrow-like mRNA targets directed by a class of Arabidopsis miRNA.  
423 *Science* 297 (5589):2053-2056.
- 424 Desando, G., C. Cavallo, F. Sartoni, L. Martini, A. Parrilli *et al.*, 2013 Intra-articular  
425 delivery of adipose derived stromal cells attenuates osteoarthritis progression  
426 in an experimental rabbit model. *Arthritis Research &*  
427 *Therapy*,15,1(2013-01-29) 15 (1):R22-R22.
- 428 Doron, B., W. Manda, G. Aaron, D.S. Marks, and S. Chris, 2008 The microRNA.org  
429 resource: targets and expression. *Nucleic Acids Res* 36 (Database  
430 issue):149-153.
- 431 Effat, A., A. Abolfazl, E. Mohamadreza Baghaban, B. Abolfazl, H. Shahryar *et al.*,  
432 2015 Up Regulation of Liver-enriched Transcription Factors HNF4a and  
433 HNF6 and Liver-Specific MicroRNA (miR-122) by Inhibition of Let-7b in  
434 Mesenchymal Stem Cells. *Chemical Biology & Drug Design* 85 (3):268-279.
- 435 Fabian, M.R., N. Sonenberg, and W. Filipowicz, 2010 Regulation of mRNA  
436 translation and stability by microRNAs. [Review] [189 refs]. *Annual Review*  
437 *of Biochemistry* 79 (1):351-379.
- 438 Friedman, R., K. Farh, Cb, and D. Bartel, 2008 Most mammalian mRNAs are  
439 conserved targets of microRNAs. *Genome Research* 19 (1):92-105.
- 440 Gu, Z., and S. Eleswarapu, H, 2007 Identification and characterization of microRNAs

- 441 from the bovine adipose tissue and mammary gland. *Febs Letters* 581  
442 (5):981-988.
- 443 Guo, Y., D. Mo, Y. Zhang, Y. Zhang, P. Cong *et al.*, 2012 MicroRNAome comparison  
444 between intramuscular and subcutaneous vascular stem cell adipogenesis. *Plos*  
445 *One* 7 (9):e45410.
- 446 Guoxi, L., L. Yanjie, L. Xinjian, N. Xiaomin, L. Meihang *et al.*, 2011 MicroRNA  
447 identity and abundance in developing swine adipose tissue as determined by  
448 Solexa sequencing. *Journal of Cellular Biochemistry* 112 (5):1318-1328.
- 449 Jing, Z., Y. Zheng-Zhou, T. Zhong-Lin, L. Liang-Qi, and L. Kui, 2012  
450 MicroRNA-148a promotes myogenic differentiation by targeting the ROCK1  
451 gene. *Journal of Biological Chemistry* 287 (25):21093-21101.
- 452 Kang, M., ., L.M. Yan, Y.M. Li, W.Y. Zhang, H. Wang, . *et al.*, 2013 Inhibitory effect  
453 of microRNA-24 on fatty acid-binding protein expression on 3T3-L1  
454 adipocyte differentiation. *Genetics & Molecular Research Gmr* 12  
455 (4):5267-5277.
- 456 Karbiener, M., C. Fischer, S. Nowitsch, P. Opriessnig, C. Papak *et al.*, 2009  
457 microRNA miR-27b impairs human adipocyte differentiation and targets  
458 PPAR $\gamma$ . *Biochem Biophys Res Commun* 390 (2):247-251.
- 459 Karbiener, M., C. Neuhold, P. Opriessnig, A. Prokesch, and M. Scheideler, 2011  
460 MicroRNA-30c promotes human adipocyte differentiation and co-represses  
461 PAI-1 and ALK2. *Rna Biology* 8 (5):850-860.
- 462 Lin, Z., L. Guo-Cai, S. Jifang, and Y. Yi-Da, 2010 Effect of miRNA-10b in regulating  
463 cellular steatosis level by targeting PPAR-alpha expression, a novel  
464 mechanism for the pathogenesis of NAFLD. *J Gastroenterol Hepatol* 25  
465 (1):156-163.
- 466 Livak, K.J., and T.D. Schmittgen, 2001 Analysis of relative gene expression data  
467 using real-time quantitative PCR and the 2(-Delta Delta C(T)) Method.  
468 *Methods* 25 (4):402-408.
- 469 Lunli, G., W. Chen, L. Yarong, S. Qingzhang, L. Guangzao *et al.*, 2014 Effects of  
470 human adipose-derived stem cells on the viability of rabbit random pattern

- 471 flaps. *Cytotherapy* 16 (4):496-507.
- 472 Mariana, L.Q., R. Reinhard, Y. Abdullah, M. Jutta, L. Winfried *et al.*, 2002  
473 Identification of tissue-specific microRNAs from mouse. *Current Biology Cb*  
474 12 (9):735-739.
- 475 Meihang, L., L. Zhenjiang, Z. Zhenzhen, L. Guannv, S. Shiduo *et al.*, 2015 miR-103  
476 promotes 3T3-L1 cell adipogenesis through AKT/mTOR signal pathway with  
477 its target being MEF2D. *Biological Chemistry* 396 (3):235-244.
- 478 Michael, K., F. Christoph, N. Susanne, O. Peter, P. Christine *et al.*, 2009 microRNA  
479 miR-27b impairs human adipocyte differentiation and targets PPARgamma.  
480 *Biochem Biophys Res Commun* 390 (2):247-251.
- 481 Nam, J.W., O. Rissland, D. Koppstein, C. Abreu-Goodger, C. Jan *et al.*, 2014 Global  
482 Analyses of the Effect of Different Cellular Contexts on MicroRNA Targeting.  
483 *Molecular Cell* 53 (6):1031-1043.
- 484 Nora, K.T., B. Susan, K. Peter, M.R. Sch?N, F. Mathias *et al.*, 2009 MicroRNA  
485 expression in human omental and subcutaneous adipose tissue. *Plos One* 4  
486 (3):e4699.
- 487 Ortega, F.J., J.M. Moreno-Navarrete, P. Gerard, S. Monica, H. Manuela *et al.*, 2010  
488 MiRNA expression profile of human subcutaneous adipose and during  
489 adipocyte differentiation. *Plos One* 5 (2):e9022.
- 490 Qiang, S., Z. Yan, Y. Guang, C. Xiaoping, Z. Yingai *et al.*, 2008 Transforming growth  
491 factor-beta-regulated miR-24 promotes skeletal muscle differentiation. *Nucleic*  
492 *Acids Res* 36 (8):2690.
- 493 Shi, C., M. Zhang, M. Tong, L. Yang, L. Pang *et al.*, 2015 miR-148a is Associated  
494 with Obesity and Modulates Adipocyte Differentiation of Mesenchymal Stem  
495 Cells through Wnt Signaling. *Scientific Reports* 5:9930.
- 496 Son, Y.H., S. Ka, A.Y. Kim, and J.B. Kim, 2014 Regulation of Adipocyte  
497 Differentiation via MicroRNAs. *Endocrinol Metab* 29 (2):122-135.
- 498 Wang, G.Z., K. Du, S.Q. Hu, S.Y. Chen, X.B. Jia *et al.*, 2018a Genome-wide  
499 identification and characterization of long non-coding RNAs during postnatal  
500 development of rabbit adipose tissue. *Lipids Health Dis* 17 (1):271.

- 501 Wang, Q., R. Qi, J. Wang, W. Huang, Y. Wu *et al.*, 2017 Differential expression  
502 profile of miRNAs in porcine muscle and adipose tissue during development.  
503 *Gene* 618:49-56.
- 504 Wang, S., Y. Zhang, X. Yuan, R. Pan, W. Yao *et al.*, 2018b Identification of  
505 differentially expressed microRNAs during preadipocyte differentiation in  
506 Chinese crested duck. *Gene* 661:S0378111918303354.
- 507 Wang, W., N. He, C. Feng, V. Liu, L. Zhang *et al.*, 2015 Human Adipose-Derived  
508 Mesenchymal Progenitor Cells Engraft into Rabbit Articular Cartilage.  
509 *International Journal of Molecular Sciences* 16 (6):12076-12091.
- 510 Weiyi, L., B. Pengpeng, S. Tizhong, Y. Xin, Y. Hang *et al.*, 2013 miR-133a regulates  
511 adipocyte browning in vivo. *Plos Genetics* 9 (7):e1003626.
- 512 Xuemei, C., 2004 A microRNA as a translational repressor of APETALA2 in  
513 Arabidopsis flower development. *Science* 303 (5666):2022-2025.
- 514 Yang, X., L. Wang, D. Yuan, K. Lindsey, and X. Zhang, 2013 Small RNA and  
515 degradome sequencing reveal complex miRNA regulation during cotton  
516 somatic embryogenesis. *Journal of Experimental Botany* 64 (6):1521-1536.
- 517 Ye, X., P. Zhang, S. Xue, Y. Xu, J. Tan *et al.*, 2014 Adipose-derived stem cells  
518 alleviate osteoporosis by enhancing osteogenesis and inhibiting adipogenesis  
519 in a rabbit model. *Cytotherapy* 16 (12):1643-1655.
- 520 Yu, L., R. Zhang, P. Li, D. Zheng, J. Zhou *et al.*, 2015 Traditional Chinese Medicine:  
521 *Salvia miltiorrhiza* Enhances Survival Rate of Autologous Adipose Tissue  
522 Transplantation in Rabbit Model. *Aesthetic Plastic Surgery* 39 (6):992.
- 523 Zaragosi, L.E., 2011 Small RNA sequencing reveals miR-642a-3p as a novel  
524 adipocyte-specific microRNA and miR-30 as a key regulator of human  
525 adipogenesis. *Genome Biology* 12 (7):R64.
- 526 Zhou, J., F. Guo, G. Wang, J. Wang, F. Zheng *et al.*, miR-20a regulates adipocyte  
527 differentiation by targeting lysine-specific demethylase 6b and transforming  
528 growth factor- $\beta$  signaling. *International Journal of Obesity*.
- 529

530 **Tables**

531 **Table 1.** Primer information of 6 MiRNAs used for q-PCR validation.

| MiRNA Name           | Sequence of primer(5'→3')                         | Tm(°C) |
|----------------------|---------------------------------------------------|--------|
| ocu-miR-1296-5p      | F: TTAGGGCCCTGGCTCCATCTCC<br>R: TGGTGTCGTGGAGTCG  |        |
| ocu-miR-193b-3p      | F: AACTGGCCACAAAGTCCCGCT<br>R: TGGTGTCGTGGAGTCG   |        |
| mmu-miR-3968_1ss14AT | F: CGAATCCCACTCCTGACACCA<br>R: TGGTGTCGTGGAGTCG   |        |
| mmu-miR-199a-3p_R+1  | F: ACAGTAGTCTGCACATTGGTTAA<br>R: TGGTGTCGTGGAGTCG | 61     |
| ocu-let-7d-3p        | F: CTATACGACCTGCTGCCTTTCT<br>R: TGGTGTCGTGGAGTCG  |        |
| ocu-miR-7a-5p        | F: TGGAAGACTAGTGATTTTGTGTT<br>R: TGGTGTCGTGGAGTCG |        |
| <i>GAPDH</i>         | F: CTTCGGCATTGTGGAGGG<br>R: GGAGGCAGGGATGATGTTCT  |        |

532

**Table 2.** Summary and quality assessments of the sequencing data.

| Sample | Raw reads | 3ADT&lengt<br>h filter | Junk<br>reads | Rfam   | mRNA   | Repeats | valid reads<br>(%) | Uniq-Valid<br>(%) |
|--------|-----------|------------------------|---------------|--------|--------|---------|--------------------|-------------------|
| YR-1   | 11020729  | 9308844                | 12969         | 165455 | 118653 | 18475   | 1416639            | 213868<br>(36.36) |
| YR-2   | 10138426  | 8019757                | 10746         | 180695 | 135763 | 21938   | 1790816            | 197112<br>(34.91) |
| YR-3   | 10176451  | 8013676                | 9839          | 179127 | 111134 | 21368   | 1865907            | 172905<br>(29.91) |
| MR-1   | 15721988  | 994540                 | 30291         | 283721 | 271773 | 53817   | 14139070           | 381169<br>(47.15) |
| MR-2   | 13886841  | 3617844                | 15573         | 119003 | 103054 | 26165   | 10031780           | 226919<br>(32.46) |
| TR-1   | 12069306  | 4624968                | 15623         | 183975 | 179220 | 35980   | 7066392            | 236401<br>(32.32) |
| TR-2   | 12654630  | 9689623                | 19670         | 356202 | 246850 | 43386   | 2348064            | 288767<br>(34.81) |
| TR-3   | 13309976  | 587597                 | 20938         | 172942 | 128235 | 30787   | 12394709           | 227947<br>(43.96) |



533 Note: Samples are denoted by sample names. Raw Reads represent the original sequencing data.  
 534 Valid reads represent valid data obtained after filtering 3ADT & length filter, Junk reads, Rfam,  
 535 mRNA and Repeats databases. Uniq-valid represents the Valid Unique copy number obtained.

**Table 3.** Sequence distribution of each unique MiRNA from each sample.

| length | YR-1     | YR-2     | YR-3     | MR-1     | MR-2     | TR-1     | TR-2     | TR-3     |
|--------|----------|----------|----------|----------|----------|----------|----------|----------|
| 18     | 28494    | 26300    | 26447    | 43900    | 17513    | 25208    | 43594    | 18368    |
|        | (13.32%) | (13.34%) | (15.30%) | (11.52%) | (7.72%)  | (10.66%) | (15.10%) | (8.06%)  |
| 19     | 28582    | 24865    | 24264    | 49220    | 18956    | 26278    | 42588    | 23592    |
|        | (13.36%) | (12.61%) | (14.03%) | (12.91%) | (8.35%)  | (11.12%) | (14.75%) | (10.35%) |
| 20     | 27981    | 24640    | 22618    | 54436    | 21989    | 27892    | 40821    | 29560    |
|        | (13.08%) | (12.50%) | (13.08%) | (14.28%) | (9.69%)  | (11.80%) | (14.14%) | (12.97%) |
| 21     | 30951    | 27716    | 26771    | 62982    | 33879    | 36155    | 44653    | 39681    |
|        | (14.47%) | (14.06%) | (15.48%) | (16.52%) | (14.93%) | (15.29%) | (15.46%) | (17.41%) |
| 22     | 26686    | 25794    | 22576    | 61580    | 36571    | 36073    | 37685    | 42513    |
|        | (12.48%) | (13.09%) | (13.06%) | (16.16%) | (16.12%) | (15.26%) | (13.05%) | (18.65%) |
| 23     | 24981    | 23443    | 15543    | 47535    | 30271    | 28478    | 27206    | 33886    |
|        | (11.68%) | (11.89%) | (8.99%)  | (12.47%) | (13.34%) | (12.05%) | (9.42%)  | (14.87%) |
| 24     | 34702    | 29210    | 27878    | 36777    | 49997    | 40183    | 38246    | 25985    |
|        | (16.23%) | (14.82%) | (16.12%) | (9.65%)  | (22.03%) | (17.00%) | (13.24%) | (11.40%) |
| 25     | 7368     | 9123     | 4603     | 16040    | 11445    | 10603    | 9194     | 9908     |
|        | (3.45%)  | (4.63%)  | (2.66%)  | (4.21%)  | (5.04%)  | (4.49%)  | (3.18%)  | (4.35%)  |
| 26     | 4123     | 6021     | 2205     | 8699     | 6298     | 5531     | 4780     | 4454     |
|        | (1.93%)  | (3.05%)  | (1.28%)  | (2.28%)  | (2.78%)  | (2.34%)  | (1.66%)  | (1.95%)  |

536 Note: Length represents the length of MiRNA sequences.

**Table 4.** Length distribution of the identified MiRNAs.

| Length | Unique miRNA | Known miRNA | New miRNA  |
|--------|--------------|-------------|------------|
| 18     | 40 (4.05%)   | 20(2.56%)   | 20(9.66%)  |
| 19     | 37 (3.75%)   | 8(1.03%)    | 29(14.01%) |
| 20     | 44 (4.46%)   | 27(3.46%)   | 17(8.21%)  |
| 21     | 180 (18.24%) | 154(19.74%) | 26(12.56%) |
| 22     | 398 (40.32%) | 336(43.08%) | 62(29.95%) |
| 23     | 212 (21.48%) | 170(21.79%) | 42(20.29%) |
| 24     | 55 (5.57%)   | 46(5.89%)   | 9(4.35%)   |
| 25     | 15(1.52%)    | 13(1.67%)   | 2(0.96%)   |
| 26     | 6(0.61%)     | 6(0.76%)    | 0          |
| all    | 987          | 780         | 207        |

537

538

539

540 **Figures**

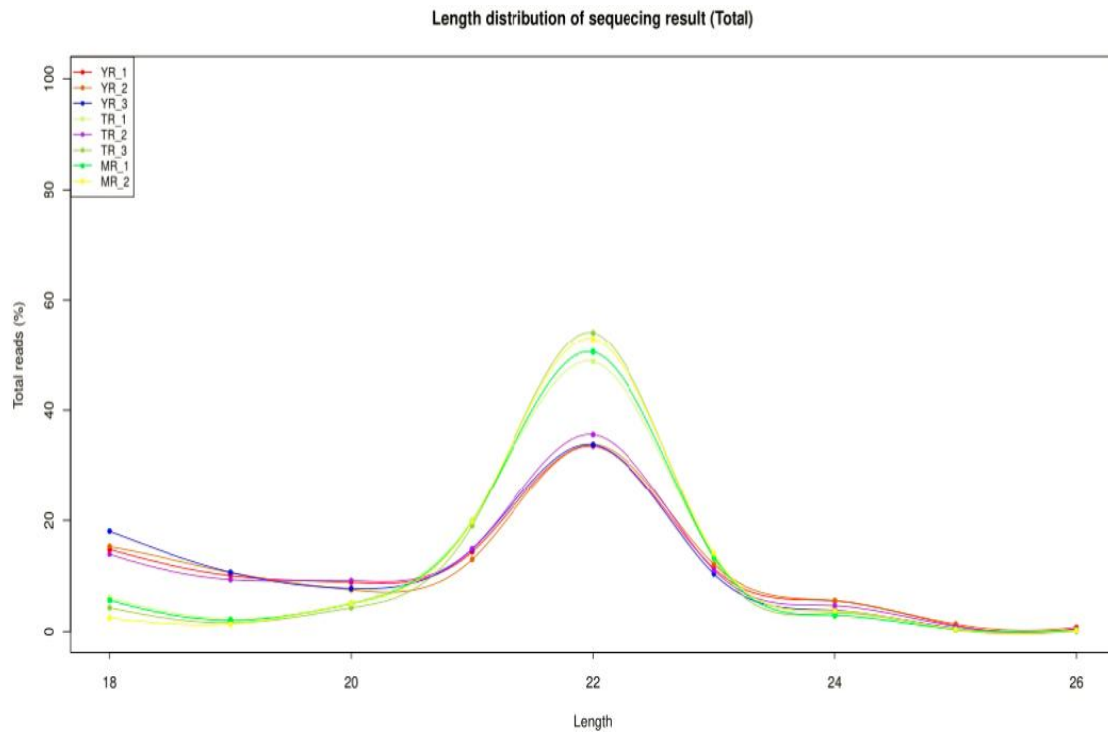

541

542 **Figure 1.** Length distribution of the 987 miRNAs.

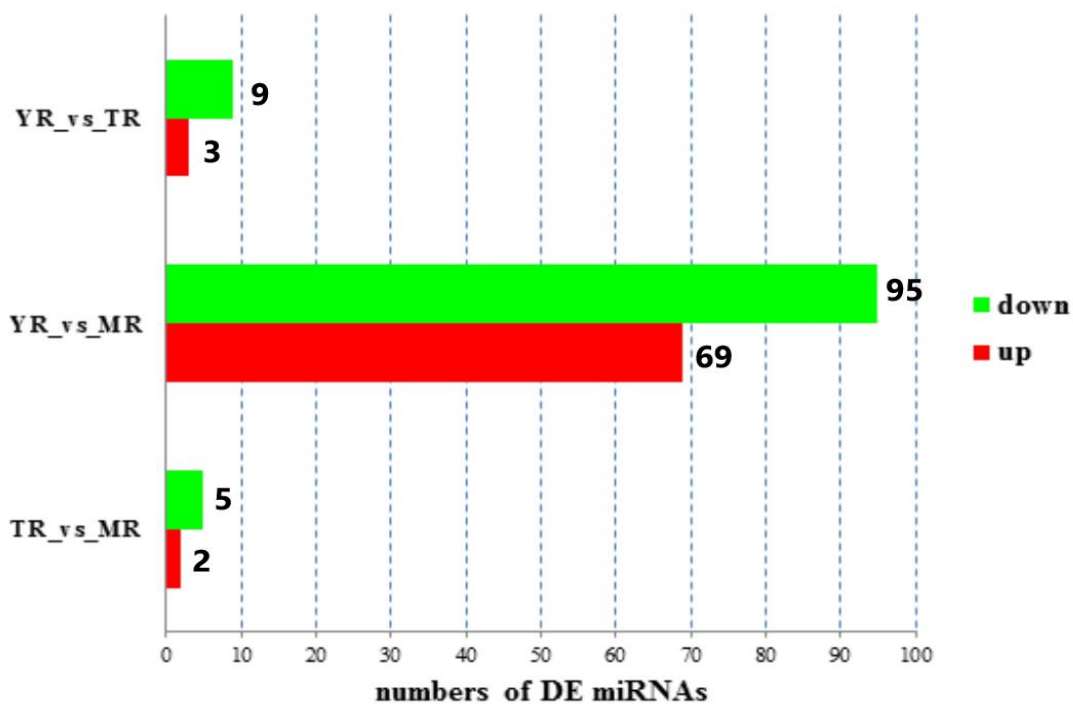

543

544 **Figure 2.** Up and down-regulated miRNAs in the rabbit perirenal adipose

545 during the three growth periods ( $P < 0.05$ ).



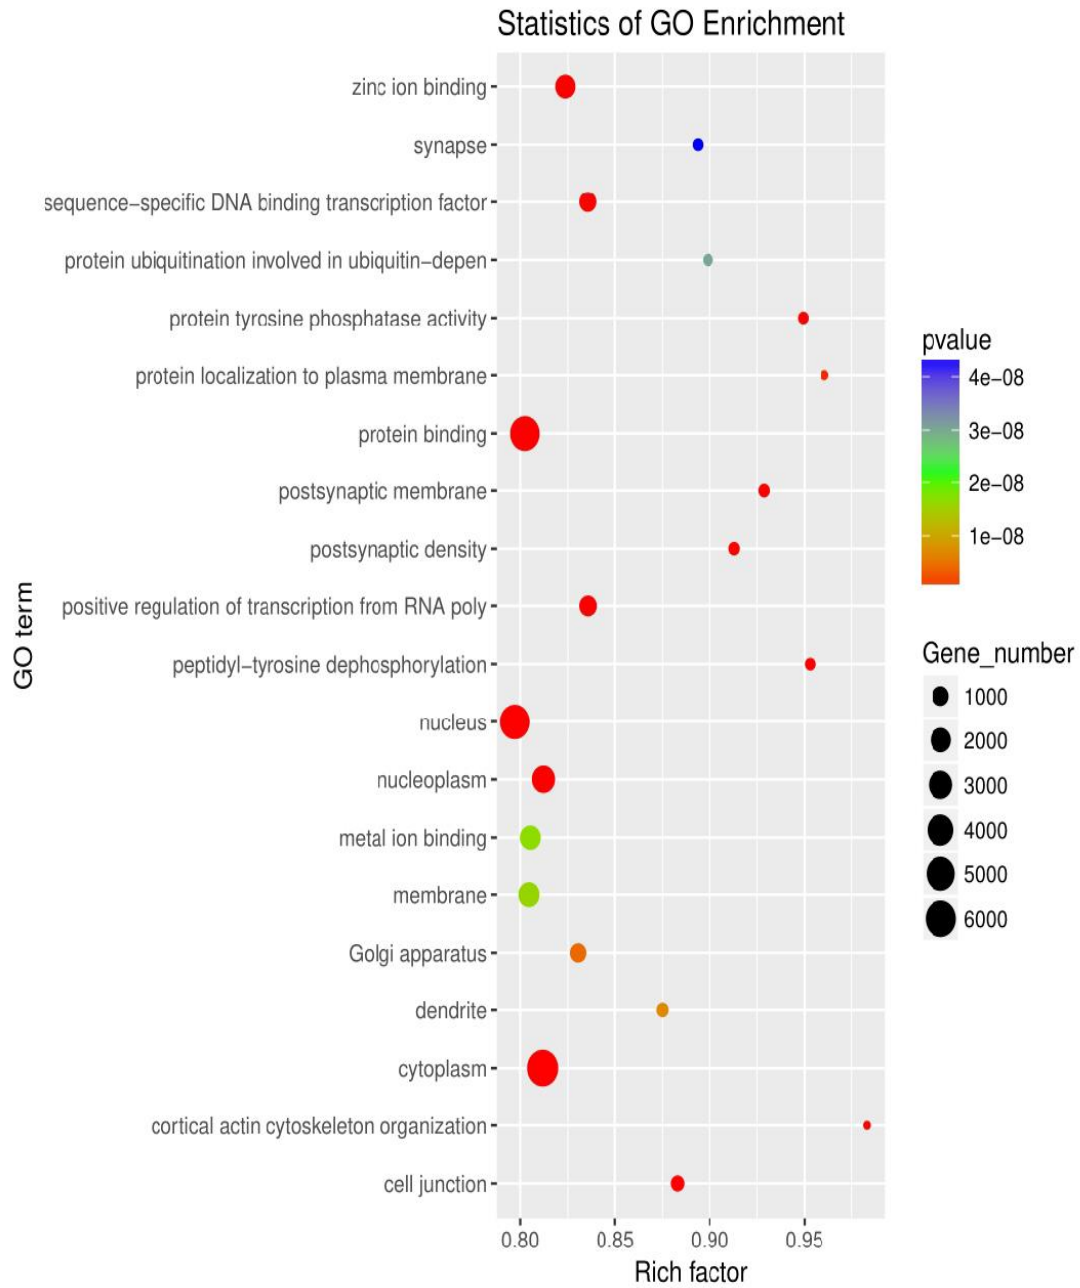

**Figure 4.** Top 20 significant terms of GO enrichment analysis of target genes of DE miRNAs at  $p$ -value  $< 0.05$ .

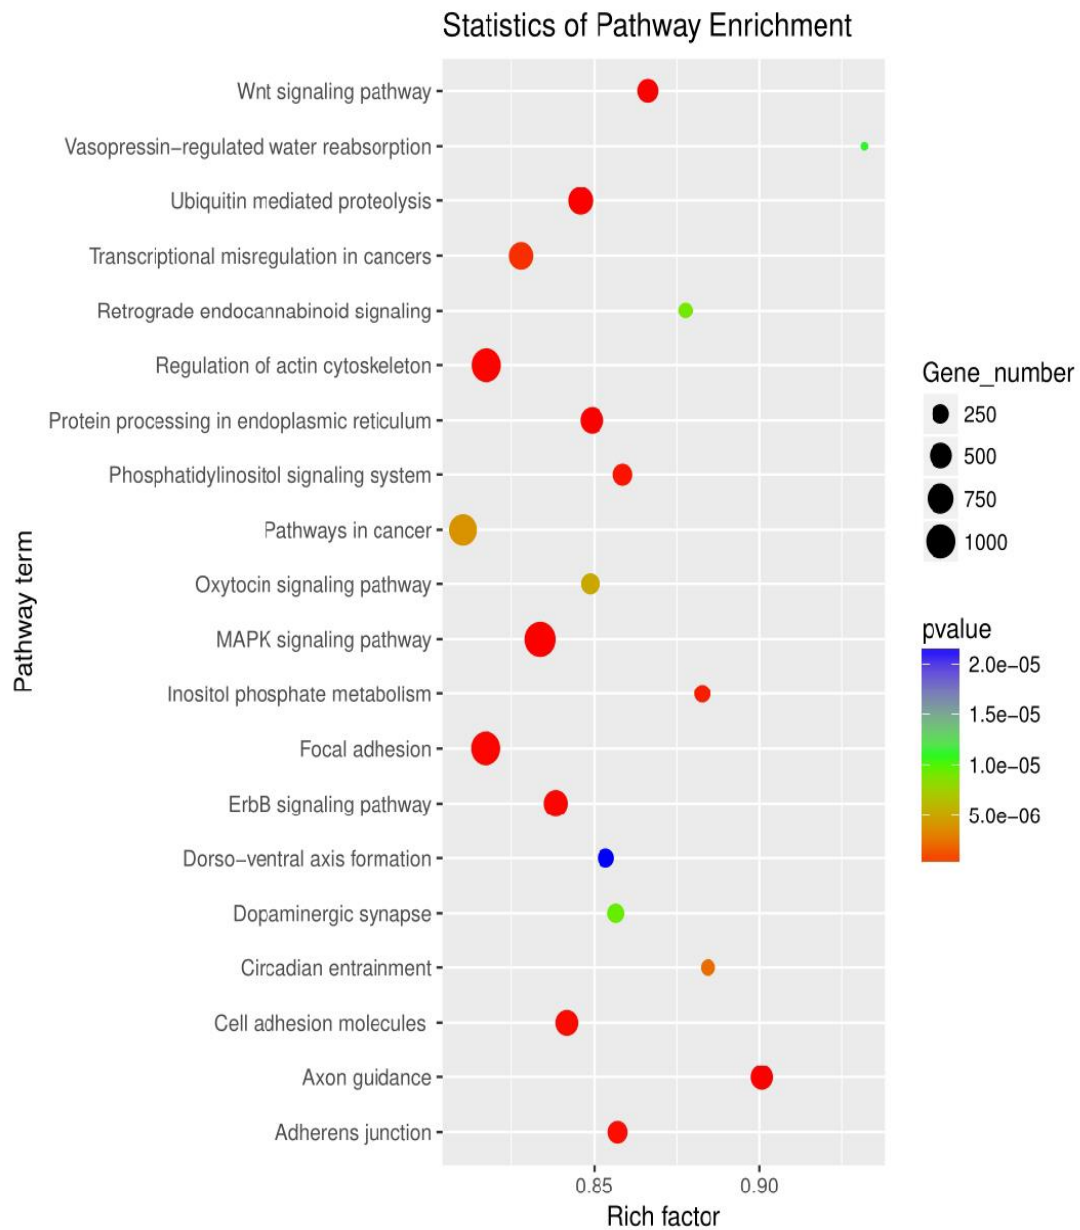

**Figure 5.** The top 20 significant terms of KEGG Pathway analysis of target genes of DE miRNAs at  $p$ -value  $< 0.05$ .

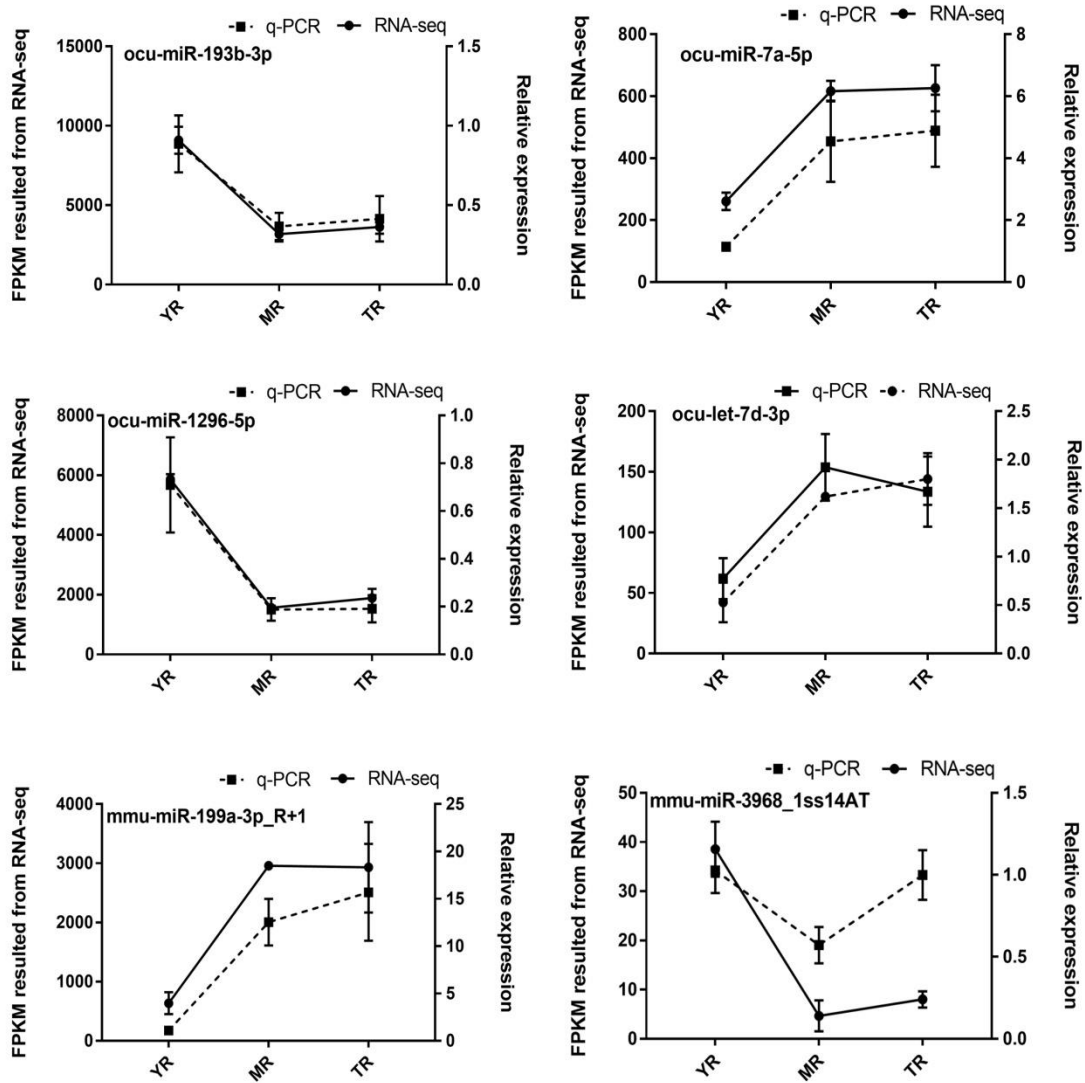

**Figure 6.** Validation of the six randomly selected DE miRNAs by q-PCR.
